# Supplementary material for: The bZIP transcription factor BIP1 of the rice blast fungus is essential for infection and regulates a specific set of appressorium genes
Source: PubMed Central journal article supplement (PMC10833574; doi:10.1371/journal.ppat.1011945), 2024-01-22

**A**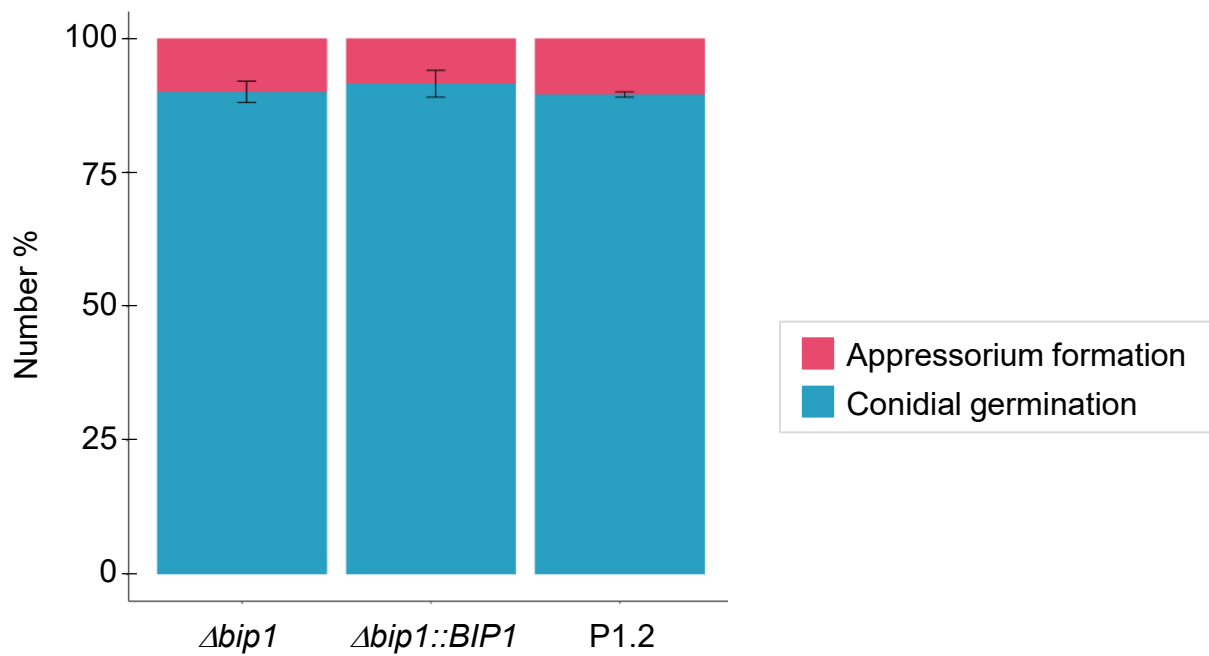**B**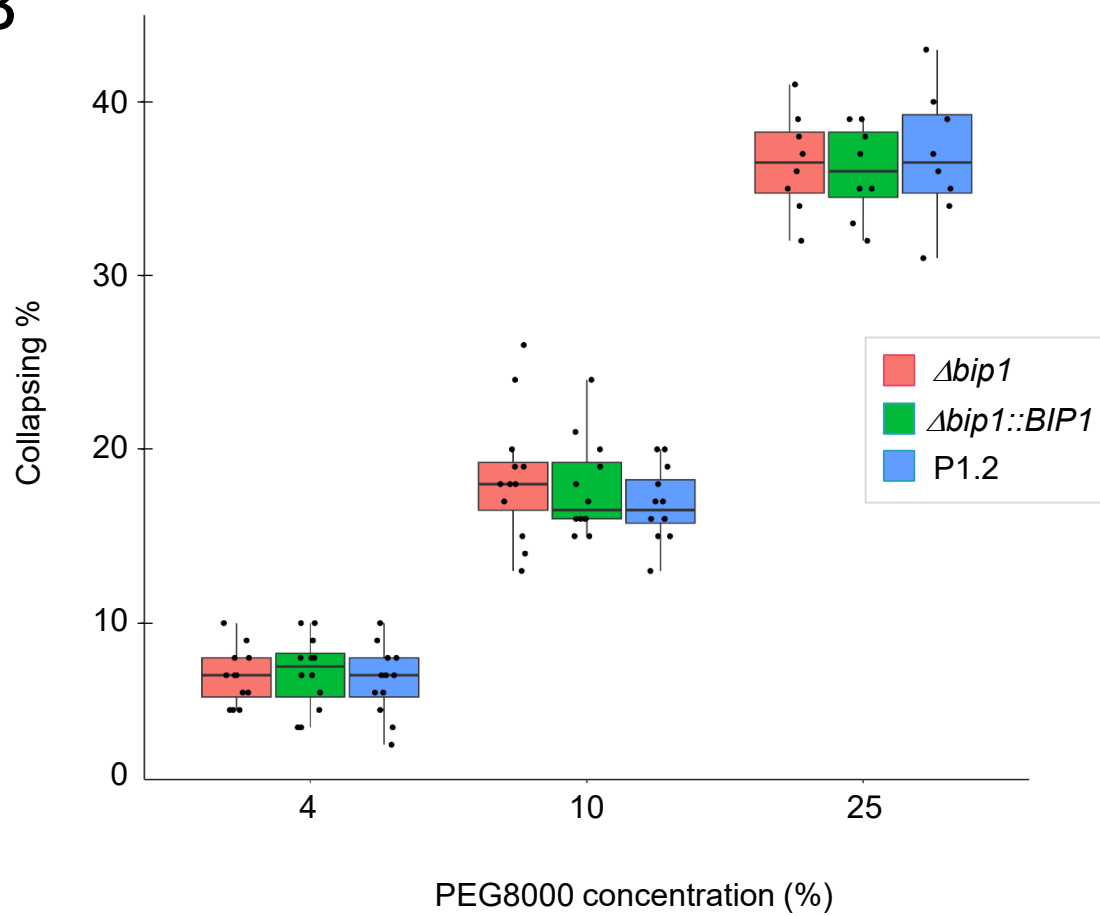

Supplement: ppat.1011945.s002.pdf [file ppat.1011945.s002.pdf]
