# Supplementary material for: The bZIP transcription factor BIP1 of the rice blast fungus is essential for infection and regulates a specific set of appressorium genes
Source: PubMed Central journal article supplement (PMC10833574; doi:10.1371/journal.ppat.1011945), 2024-01-22
Supplement: ppat.1011945.s010.pdf [file ppat.1011945.s010.pdf]

**S1 Table. ACE1 cluster expression in  $\Delta bip1$  during barley infection 24 hai.**

| Gene ID   | Gene name in ACE1 cluster | Expression in wild type P1-2 *              | Expression in $\Delta BIP1:hph$ *           | Fold change ** |
|-----------|---------------------------|---------------------------------------------|---------------------------------------------|----------------|
| MGG_12447 | ACE1                      | $6.3 \times 10^{-4} \pm 3.7 \times 10^{-4}$ | $8.8 \times 10^{-6} \pm 4.4 \times 10^{-6}$ | 0.01           |
| MGG_08386 | BC2                       | $1.3 \times 10^{-5} \pm 5.2 \times 10^{-6}$ | $2.4 \times 10^{-4} \pm 1.0 \times 10^{-4}$ | 19             |
| MGG_08387 | CYP1                      | $1.2 \times 10^{-3} \pm 3.7 \times 10^{-4}$ | $1.1 \times 10^{-4} \pm 5.6 \times 10^{-5}$ | 0.09           |
| MGG_15928 | CYP2                      | $1.3 \times 10^{-4} \pm 1.8 \times 10^{-5}$ | $1.4 \times 10^{-3} \pm 5.0 \times 10^{-4}$ | 11             |
| MGG_08379 | CYP3                      | $1.8 \times 10^{-4} \pm 5.3 \times 10^{-4}$ | $3.1 \times 10^{-6} \pm 3.4 \times 10^{-6}$ | 0.02           |
| MGG_08378 | CYP4                      | $1.4 \times 10^{-3} \pm 2.1 \times 10^{-4}$ | $2.4 \times 10^{-5} \pm 2.7 \times 10^{-5}$ | 0.02           |
| MGG_08377 | OME1                      | $1.7 \times 10^{-4} \pm 1.1 \times 10^{-4}$ | $6.7 \times 10^{-5} \pm 4.1 \times 10^{-5}$ | 0.40           |
| MGG_08381 | ORF3                      | $3.5 \times 10^{-3} \pm 1.1 \times 10^{-3}$ | $1.6 \times 10^{-4} \pm 1.6 \times 10^{-4}$ | 0.05           |
| MGG_08391 | RAP1                      | $4.5 \times 10^{-4} \pm 1.9 \times 10^{-4}$ | $1.4 \times 10^{-4} \pm 1.6 \times 10^{-4}$ | 0.30           |
| MGG_08380 | RAP2                      | $1.2 \times 10^{-3} \pm 3.7 \times 10^{-4}$ | $6.7 \times 10^{-5} \pm 4.1 \times 10^{-5}$ | 0.05           |

\* Expression was determined by qRT-PCR. \*\* The ratio of expression between the  $\Delta bip1$  mutant and the wild-type control was calculated using the formula  $2^{-\Delta\Delta Ct \Delta bip1} / 2^{-\Delta\Delta Ct \text{ wild type}}$ .
