# Supplementary material for: The bZIP transcription factor BIP1 of the rice blast fungus is essential for infection and regulates a specific set of appressorium genes
Source: PubMed Central journal article supplement (PMC10833574; doi:10.1371/journal.ppat.1011945), 2024-01-22
Supplement: ppat.1011945.s011.pdf [file ppat.1011945.s011.pdf]

**S2 Table. Expression of 15 BIP1-regulated genes during initial stages of rice infection (16hpi).**

| <b>Class</b>  | <b>Gene</b>      | <b>Name</b>        | <b>Ratio <math>\Delta bip1/P1.2</math> *</b> |
|---------------|------------------|--------------------|----------------------------------------------|
| SSPs          | <i>MGG_11610</i> | <i>BAS3</i>        | 0                                            |
|               | <i>MGG_09693</i> | <i>BAS2</i>        | 0                                            |
|               | <i>MGG_00751</i> | -                  | 0                                            |
|               | <i>MGG_12655</i> | <i>AVR-Pi9</i>     | 0                                            |
|               | <i>MGG_17425</i> | -                  | 0,002 #                                      |
|               | <i>MGG_06666</i> | -                  | 0,016 #                                      |
|               | <i>MGG_05638</i> | -                  | 0,15 #                                       |
|               | <i>MGG_03504</i> | -                  | 0,22                                         |
|               | <i>MGG_08428</i> | -                  | 0,38                                         |
|               | <i>MGG_07934</i> | -                  | 0,45                                         |
| Enzymes       | <i>MGG_02201</i> | endopeptidase      | 0,003 #                                      |
|               | <i>MGG_08480</i> | lipase/esterase    | 0,13 #                                       |
|               | <i>MGG_11966</i> | cutinase           | 0,58                                         |
| ACE1 Cluster  | <i>MGG_12447</i> | <i>ACE1</i>        | 0                                            |
|               | <i>MGG_08381</i> | <i>ORF3</i>        | 0                                            |
| Control genes | <i>MGG_05344</i> | snodprot 1         | 0,58                                         |
|               | <i>MGG_03245</i> | aldose 1-epimerase | 0,76                                         |

\*Expression was determined by qRT-PCR. The ratio of expression between the  $\Delta bip1$  mutant and the wild-type control was calculated using the formula  $2^{-\Delta Ct \Delta bip1} / 2^{-\Delta Ct \text{ wild type}}$ . "0" indicates expressed in WT but not expressed in  $\Delta bip1$ . # indicates significantly different at  $p > 0,05$  according to t-test using expression values from three biological replicate samples. Similar results were obtained in two other independent experiments.
