# Supplementary material for: The bZIP transcription factor BIP1 of the rice blast fungus is essential for infection and regulates a specific set of appressorium genes
Source: PubMed Central journal article supplement (PMC10833574; doi:10.1371/journal.ppat.1011945), 2024-01-22
Supplement: ppat.1011945.s012.pdf [file ppat.1011945.s012.pdf]

**S3 Table. Summary of BIP1 binding to target promoter used for EMSA.**

| Promoter                | Probe location bp | Probe sequence 5' to 3'                              | BIP1 Binding | Description       |
|-------------------------|-------------------|------------------------------------------------------|--------------|-------------------|
| MGG_02201               | -272 to -223      | ttttttgcgtgtcaaaagaccgagtcataatgtgtttgactttcacccg    | +            | Peptidase         |
| MGG_03584               | -305 to -354      | cacagccctccatatccctgcgtcgagaaccctgccttctcgccatacga   | -            | <i>PTH11-like</i> |
|                         | -462 to -413      | acagccgttctcatcgactgactcgtcaaccctggattcatatactacga   | +            |                   |
| MGG_06535               | -645 to -596      | ctttgcatacacagggttcttgactcgaggatcatggtaggatttagccct  | +            | <i>PTH11-like</i> |
| MGG_08380/<br>MGG_08381 | -208 to -255      | gcaaaaggtattttcgagtcgatgctcctagtcgatggaataaaagatggga | +            | <i>RAP2/ORF3</i>  |
| MGG_08386               | -370 to -789      | aacgcctgataaccttattgatcgtttgcacttcaaactcgtttgccgac   | -            | <i>BC2 TF</i>     |
|                         | -285 to -334      | ccttcagattatcctacaacttttgccatggtgatggattcgaattatc    | -            |                   |
|                         | -197 to -246      | cgatgccacaaacacaagctcaagtgcgaacgtgagccaagcattaccga   | -            |                   |
|                         | -398 to -447      | cgtcxaaagtttgaatttgacctgatcattagcgttctgttgaactttt    | -            |                   |
