# Supplementary material for: The bZIP transcription factor BIP1 of the rice blast fungus is essential for infection and regulates a specific set of appressorium genes
Source: PubMed Central journal article supplement (PMC10833574; doi:10.1371/journal.ppat.1011945), 2024-01-22
Supplement: ppat.1011945.s013.pdf [file ppat.1011945.s013.pdf]

**S4 Table. Summary of bZIP transcription factors in *M. oryzae*.**

| number          | CD               | Interpro                        | Super-family       | Panther   | MobZIP Kong et al. 2015 | MoBzip Tang et al. 2015 | MoBZIP Liu et al. 2022 | Locus 70-15 v8   | Annotation  |
|-----------------|------------------|---------------------------------|--------------------|-----------|-------------------------|-------------------------|------------------------|------------------|-------------|
| MoBZIP01        | cd14688          | IPR004827, IPR046347            | SSF57959           | PTHR40621 | MobZIP01                | MoBzip1                 | MoBZIP1                | MGG_00342        | F1bB        |
| MoBZIP02        | cd14688, cd43524 | IPR004827, IPR046347            | NF*                | PTHR11462 | MobZIP02                | MoGCN4                  | MoBZIP2                | MGG_00602        | CPC1        |
| MoBZIP03        | cd21462          | PRO31106, IPR004827, IPR046347  | SSF57959           | NF        | MobZIP03                | Mo-Idi4                 | MoBZIP3                | MGG_01990        | IDI4        |
| MoBZIP04        | cd14687          | IPR004827, IPR046347            | SSF57959           | PTHR19304 | MobZIP04                | MoBzip3                 | MoBZIP4                | MGG_02006        | bZIP        |
| MoBZIP05        | cd14688          | IPR031106, IPR004827, IPR014720 | SSF57959           | PTHR40621 | MobZIP05                | MoFcr3                  | MoBZIP5                | MGG_02632        | RmsA        |
| MoBZIP06        | cd14688          | IPR004827, IPR046347            | SSF57959           | NF        | MobZIP06                | MoBzip4                 | MoBZIP6                | MGG_02865        | bZIP        |
| MoBZIP07        | cd14810          | IPR004827, IPR046347            | SSF57959           | PTHR19304 | MobZIP07                | MoBzip5                 | MoBZIP7                | MGG_03288        | bZIP        |
| MoBZIP08        | cd14687          | IPR004827, IPR046347            | SSF57959           | PTHR19304 | MobZIP08                | MoBzip6                 | MoBZIP8                | MGG_04009        | bZIP        |
| MoBZIP09        | cd21462          | NF                              | NF                 | PTHR13044 | MobZIP09                | NF                      | MoBZIP9                | MGG_04122        | bZIP        |
| MoBZIP10        | cd21462          | IPR004827, IPR046347            | SSF57959           | PTHR47416 | MobZIP10                | MoBzip12                | MoBZIP10               | MGG_04758        | bZIP        |
| MoBZIP11        | NF               | NF                              | NF                 | NF        | MobZIP11                | NF                      | NF                     | MGG_05016        | unknown     |
| MoBZIP12        | cd14688          | IPR004827, IPR046347            | SSF57959           | PTHR40621 | MobZIP12                | MoMeaB                  | MoBZIP12               | MGG_05306        | MEAB        |
| MoBZIP13        | NF               | IPR004827, IPR046347, IPR018287 | SSF57959           | PTHR40621 | MobZIP13                | MoHapX                  | MoBZIP13               | MGG_05959        | HAPX        |
| MoBZIP14        | cd21462          | IPR004827, IPR046347            | SSF57959           | PTHR40621 | MobZIP14                | MoBzip10                | NF                     | MGG_06131        | bZIP        |
| MoBZIP15        | cd14688          | IPR004827, IPR046347            | SSF57959           | PTHR40621 | MobZIP15                | MoBzip7                 | MoBZIP15               | MGG_07305        | bZIP        |
| MoBZIP16        | cd14688          | IPR046347                       | SSF57959           | PTHR40618 | MobZIP16                | MoBzip11                | MoBZIP16               | MGG_07925        | bZIP        |
| MoBZIP17        | cd14687          | IPR004827, IPR046347, IPR021755 | SSF57959           | PTHR19304 | MobZIP17                | MoAtf1                  | MoBZIP17               | MGG_08212        | AFT1        |
| MoBZIP18        | cd14710          | IPR004827, IPR046347, IPR044280 | SSF57959           | PTHR46714 | MobZIP18                | MoHac1                  | MoBZIP18               | MGG_09010        | HAC1        |
| MoBZIP19        | cd14686          | IPR004827, IPR046347            | SSF57959           | PTHR13044 | MobZIP19                | MoBzip8                 | MoBZIP19               | MGG_10660        | bZIP        |
| MoBZIP20        | NF               | IPR004827                       | NF                 | PTHR13044 | MobZIP20                | MoBzip9                 | MoBZIP20               | MGG_12560        | MoEITF2     |
| MoBZIP21        | cd14688          | IPR004827, IPR046347, IPR023167 | SSF57959           | PTHR40621 | MobZIP21                | MoAp1                   | MoBZIP21               | MGG_12814        | AP1         |
| MoBZIP22        | cd14705          | IPR004827, IPR046347            | SSF57959           | PTHR13044 | MobZIP22                | MoMetR                  | MoBZIP22               | MGG_14561        | CYS3        |
| MoBZIP23        | cd14688          | IPR004827, IPR046347            | SSF57959           | PTHR39607 | MobZIP23                | MoBzip2                 | NF                     | MGG_00587        | bZIP        |
| MoBZIP24-1      | cd14688          | IPR004827                       | NF                 | PTHR39607 | NF                      | NF                      | MoBZIP23               | MGG_04024        | bZIP Y34    |
| MoBZIP24-2      | cd14688          | NF                              | NF                 | PTHR39607 | NF                      | NF                      | NF                     | MGG_04024        | bZIP        |
| MoBZIP25        | cd14688          | IPR004827                       | NF                 | PTHR39607 | NF                      | NF                      | MoBZIP24               | MGG_04024        | bZIP Y34    |
| <b>MoBZIP26</b> | cd14688          | NF                              | NF                 | PTHR37012 | NF                      | NF                      | NF                     | <b>MGG_08118</b> | <b>BIP1</b> |
| <b>MoBZIP27</b> | cd14688          | IPR021833                       | NF                 | PTHR37012 | NF                      | NF                      | NF                     | <b>MGG_08587</b> | <b>BIP2</b> |
| MoBZIP28        | cd14688          | IPR046347, IPR036770            | SSF57959, SSF48403 | PTHR24126 | NF                      | NF                      | NF                     | MGG_14010        | bZIP        |

\*NF: domain or gene not found.
