# Supplementary material for: The bZIP transcription factor BIP1 of the rice blast fungus is essential for infection and regulates a specific set of appressorium genes
Source: PubMed Central journal article supplement (PMC10833574; doi:10.1371/journal.ppat.1011945), 2024-01-22
Supplement: ppat.1011945.s014.pdf [file ppat.1011945.s014.pdf]

**S5 Table. Primers used in this study.**

| <b>Primers</b>               | <b>Sequence (5'/3')</b>                                      | <b>Purpose</b>                                |
|------------------------------|--------------------------------------------------------------|-----------------------------------------------|
| KO1                          | cgagaacgccctaccacccgccac                                     | deletion of <i>M. oryzae</i> BIP1             |
| KO2-Sfila                    | cacggcctgagtgccgggtccagaggagacctaattgtg                      | deletion of <i>M. oryzae</i> BIP1             |
| KO3                          | cggctaactaggagacaaagacc                                      | deletion of <i>M. oryzae</i> BIP1             |
| KO4-Sfilb                    | gtgggccatctaggccggagatgttaaatagtgtagccgc                     | deletion of <i>M. oryzae</i> BIP1             |
| KO5                          | gtccgagttcactttcacttgccc                                     | deletion of <i>M. oryzae</i> BIP1             |
| KO6                          | cccaataatatgtcccagactcc                                      | deletion of <i>M. oryzae</i> BIP1             |
| RACE-1                       | gatgatgatgtccggctggaactg                                     | 5'RACE of BIP1                                |
| RACE-2                       | cttgagggtctcgtcgcggttctg                                     | 5'RACE of BIP1                                |
| MGG_03584.7-F                | tggtgctttggctttgtcct                                         | qPCR validation                               |
| MGG_03584.7-R                | tccgaggtacgtgtaagcaa                                         | qPCR validation                               |
| MGG_06535.7-F                | actgcaagccgttgagaaagg                                        | qPCR validation                               |
| MGG_06535.7-R                | atgccagaataactgccgctg                                        | qPCR validation                               |
| MGG_08380.7-F                | ggccttgcaacttattcgtttg                                       | qPCR validation                               |
| MGG_08380.7-R                | ttgatttctggccgcat                                            | qPCR validation                               |
| MGG_08386.7-F                | aacaaggcccacagtttcagtt                                       | qPCR validation                               |
| MGG_08386.7-R                | tgcgccaggacggaat                                             | qPCR validation                               |
| MGG_08387.7-F                | cgccaggctggtacaggta                                          | qPCR validation                               |
| MGG_08387.7-R                | gcctacgcacttccagcaa                                          | qPCR validation                               |
| MGG_02160.7-F                | ttgtgacgttgatgtggcc                                          | qPCR validation                               |
| MGG_02160.7-R                | gcagcagcataaaaatcgcaa                                        | qPCR validation                               |
| MGG_02201.7-F                | aaagcggccacggttatcac                                         | qPCR validation                               |
| MGG_02201.7-R                | gatgcccttggaagtga                                            | qPCR validation                               |
| BIP1-RL5                     | gctagctaatacgcactactataggagagccaccatgactcgatcaccatc          | BIP1 Recombinant protein                      |
| BIP1-RL-Strep2               | tttttttttttttttttttttcgaactcgggtggctccaagcgctgagagccggcgattg | BIP1 Recombinant protein                      |
| <i>TERMMGG_08381.7NotI+</i>  | agcaaccatggcatggaatgcgccgcttatgtctagaatacatctg               | <i>MGG_08381.7 expression reporter vector</i> |
| <i>TERMMGG_08381.7EcoRI-</i> | ttacctgaattcgctgctcattcatctc                                 | <i>MGG_08381.7 expression reporter vector</i> |
